# Supplementary material for: Assembly of a cadmium(ii)-based chiral complex: crystal structure and optical properties for solid state white-light emission applications
Source: Royal Society of Chemistry journal article supplement (doi:10.1039/d3ma00581j), 2023-12-13
Supplement: d3ma00581j1.pdf [file d3ma00581j1.pdf]

## Assembly of cadmium (II)-based chiral complex: crystal structure and optical properties for solid state white-light emission application

Mahdi Gassara<sup>a</sup>, Xinghui Liu<sup>\*b</sup>, Ahlem Guesmi<sup>c</sup>, Ammar Houas<sup>d</sup>, Naoufel Ben Hamadi<sup>c</sup> and Houcine Naïli<sup>\*a</sup>

<sup>a</sup> Laboratory Physico Chemistry of the Solid State, Department of Chemistry, Faculty of Sciences of Sfax, Sfax University, Tunisia.  
Email: [houcine.naïli@fss.rnu.tn](mailto:houcine.naïli@fss.rnu.tn)

<sup>b</sup> Department of Materials Science and Engineering, City University of Hong Kong, 83 Tat Chee Avenue, Kowloon 999077, Hong Kong, China;  
Department of Materials Physics, Saveetha School of Engineering, Saveetha Institute of Medical and Technical Sciences (SIMTS), Thandalam, Chennai, Tamilnadu, 602105, India; Email: [liuxinghui119@gmail.com](mailto:liuxinghui119@gmail.com)

<sup>c</sup> Chemistry Department, College of Science, Imam Mohammad Ibn Saud Islamic University (IMSIU), P.O. Box 5701, Riyadh 11432, Saudi Arabia.

<sup>d</sup> Research Laboratory of Catalysis and Materials for Environment and Processes, University of Gabes, City Riadh Zerig, Gabes, 6029, Tunisia.

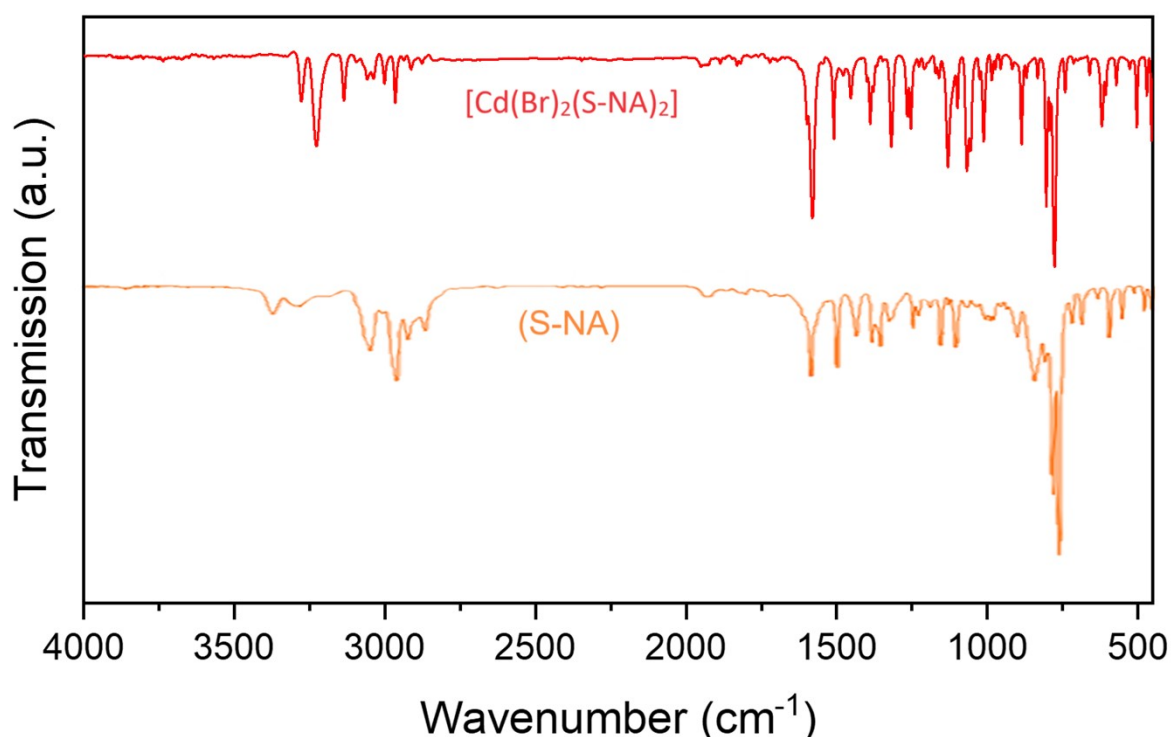

Figure S1: IR spectra of [Cd(Br)<sub>2</sub>(S-NA)<sub>2</sub>] and (S-NA) in the region of 480-4000 cm<sup>-1</sup>

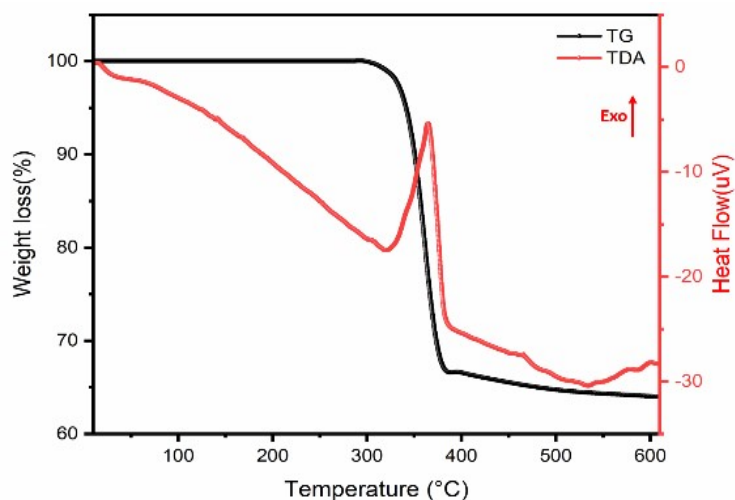

Figure S2: TGA and DTA data for  $[Cd(Br)_2(S-NA)_2]$

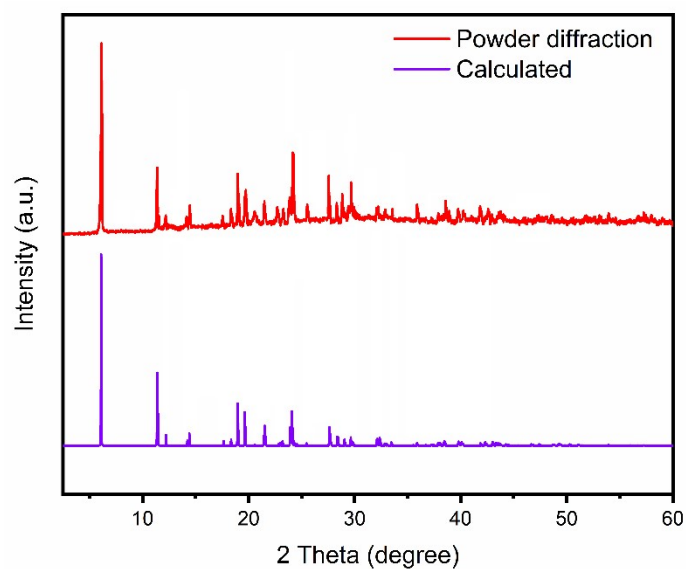

Figure S3: Poly-crystals X-ray diffraction and single crystal calculated pattern of  $[Cd(Br)_2(S-NA)_2]$

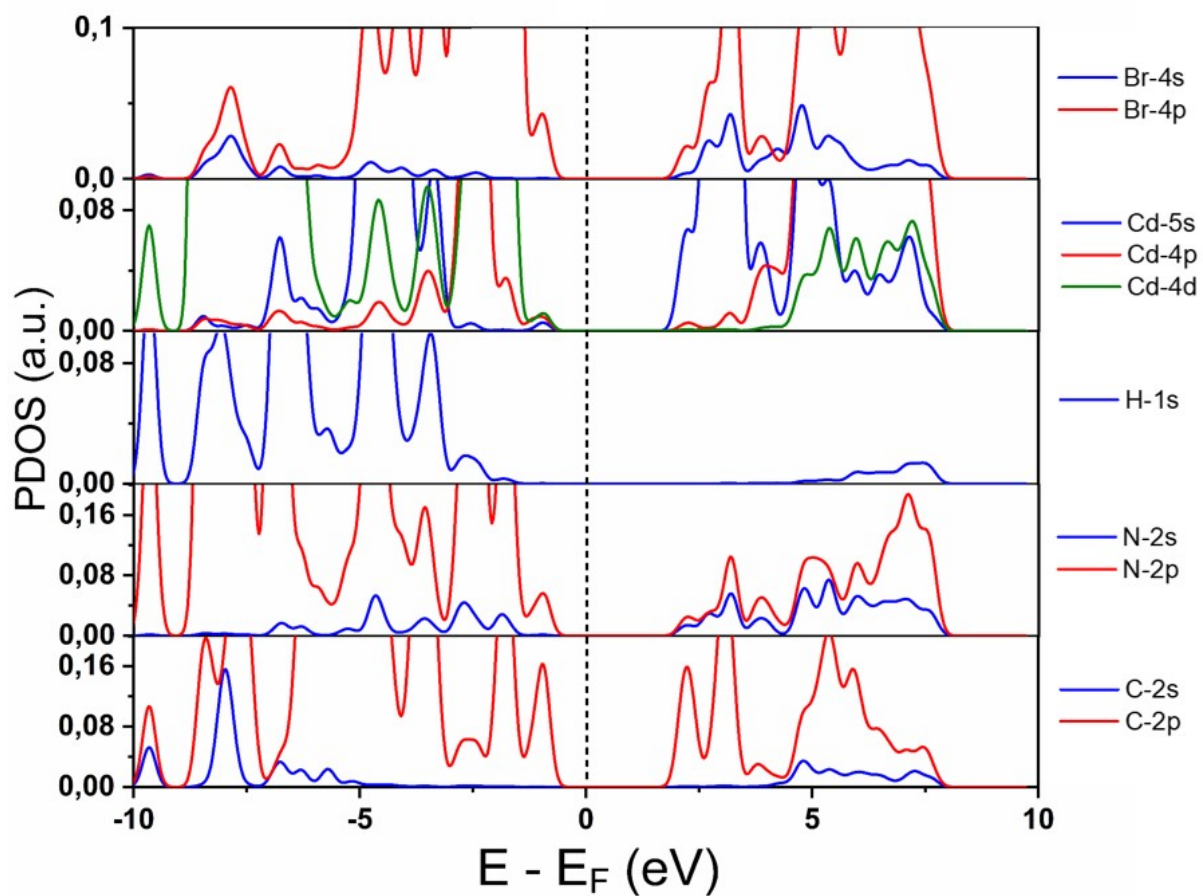

Figure S4: Zoomed PDOS

Table S1: Crystal data and structure refinement details

| Crystal parameters                            |                                                                  |
|-----------------------------------------------|------------------------------------------------------------------|
| <b>Formula</b>                                | C <sub>24</sub> H <sub>22</sub> Br <sub>2</sub> CdN <sub>2</sub> |
| <b>CCDC deposition number</b>                 | <b>2081813</b>                                                   |
| <b>Formula weight</b>                         | 610.65                                                           |
| <b>Temperature (K)</b>                        | 293                                                              |
| <b>Wavelength (Å)</b>                         | 0.71073                                                          |
| <b>Crystal system</b>                         | Monoclinic                                                       |
| <b>Space group</b>                            | <i>I</i> 2                                                       |
| <b>Unit cell dimensions</b>                   |                                                                  |
| <b>a (Å)</b>                                  | 8.0454 (14)                                                      |
| <b>b (Å)</b>                                  | 5.1075 (6)                                                       |
| <b>c (Å)</b>                                  | 29.000 (5)                                                       |
| <b>β (°)</b>                                  | 90.722 (15)                                                      |
| <b>Crystal size (mm)</b>                      | 0.12 × 0.15 × 0.38                                               |
| <b>V (Å<sup>3</sup>)</b>                      | 1191.6 (3)                                                       |
| <b>Z</b>                                      | 2                                                                |
| <b>ρ<sub>calcd</sub> (mg cm<sup>-3</sup>)</b> | 1.702                                                            |
| <b>μ (mm<sup>-1</sup>)</b>                    | 4.28                                                             |
| <b>F(000)</b>                                 | 596                                                              |
| <b>θ range for data collection (°)</b>        | 2.6 - 30.9                                                       |
| <b>h/k/l</b>                                  | -10, 11/-7, 7/-41, 41                                            |
| <b>Reflections collected</b>                  | 6599                                                             |
| <b>Independent reflections</b>                | 3521                                                             |
| <b>T<sub>max</sub> and T<sub>min</sub></b>    | 0.16, 0.32                                                       |
| <b>Goodness-of-fit on F<sup>2</sup></b>       | 1.09                                                             |
| <b>Final R indices [I[2r(l)]]</b>             | R1= 0.059 wR2= 0.176                                             |
| <b>R<sub>int</sub></b>                        | 0.075                                                            |

Table S2: Selected bond lengths and angles (Å, °) for the compound [Cd(Br)<sub>2</sub>(S-NA)<sub>2</sub>].

| bond lengths               | Å           | angles                         | Deg °      |
|----------------------------|-------------|--------------------------------|------------|
| <b>Cd1—N1<sup>i</sup></b>  | 2.259 (10)  | <b>N1i—Cd1—N1</b>              | 103.7 (4)  |
| <b>Cd1—N1</b>              | 2.259 (10)  | <b>N1i—Cd1—Br1<sup>i</sup></b> | 113.9 (2)  |
| <b>Cd1—Br1<sup>i</sup></b> | 2.5682 (12) | <b>N1—Cd1—Br1<sup>i</sup></b>  | 107.2 (2)  |
| <b>Cd1—Br1</b>             | 2.5682 (12) | <b>N1i—Cd1—Br1</b>             | 107.2 (2)  |
|                            |             | <b>N1—Cd1—Br1</b>              | 113.9 (2)  |
|                            |             | <b>Br1i—Cd1—Br1</b>            | 110.79 (6) |

Symmetry code: (i): -x+1, y, -z+1

Table S3: Hydrogen band interactions

| D—H...A                     | D—H       | H...A     | D...A     | D—H...A    |
|-----------------------------|-----------|-----------|-----------|------------|
| N1—H1N...Br1 <sup>ii</sup>  | 0.83 (19) | 2.94 (19) | 3.654 (9) | 146(14)    |
| N1—H2N...Br1 <sup>iii</sup> | 0.83 (17) | 2.77 (18) | 3.475 (8) | 144.2 (15) |

Symmetry codes: (ii) x, y+1, z; (iii) -x+1, y+1, -z+1.
